# Supplementary material for: Comparative Studies of Different Preservation Methods and Relative Freeze-Drying Formulations for Extracellular Vesicle Pharmaceutical Applications
Source: PubMed Central journal article supplement (PMC10565719; doi:10.1021/acsbiomaterials.3c00678), 2023-09-06
Supplement: ab3c00678_si_001.pdf [file ab3c00678_si_001.pdf]

# Comparative studies of different preservation methods and relative freeze-drying formulations for extracellular vesicles pharmaceutical applications

*Francesca Susa<sup>1,‡</sup>, Tania Limongi<sup>1,‡,\*</sup>, Francesca Borgione<sup>1</sup>, Silvia Peiretti<sup>1</sup>, Marta Vallino<sup>2</sup>,*

*Valentina Cauda<sup>1</sup> and Roberto Pisano<sup>1,\*</sup>*

<sup>1</sup> Department of Applied Science and Technology (DISAT), Politecnico di Torino, Corso Duca degli Abruzzi 24, 10129 Turin, Italy;

<sup>2</sup> Consiglio Nazionale delle Ricerche di Torino, Strada delle Cacce 73, 10129, Turin, Italy.

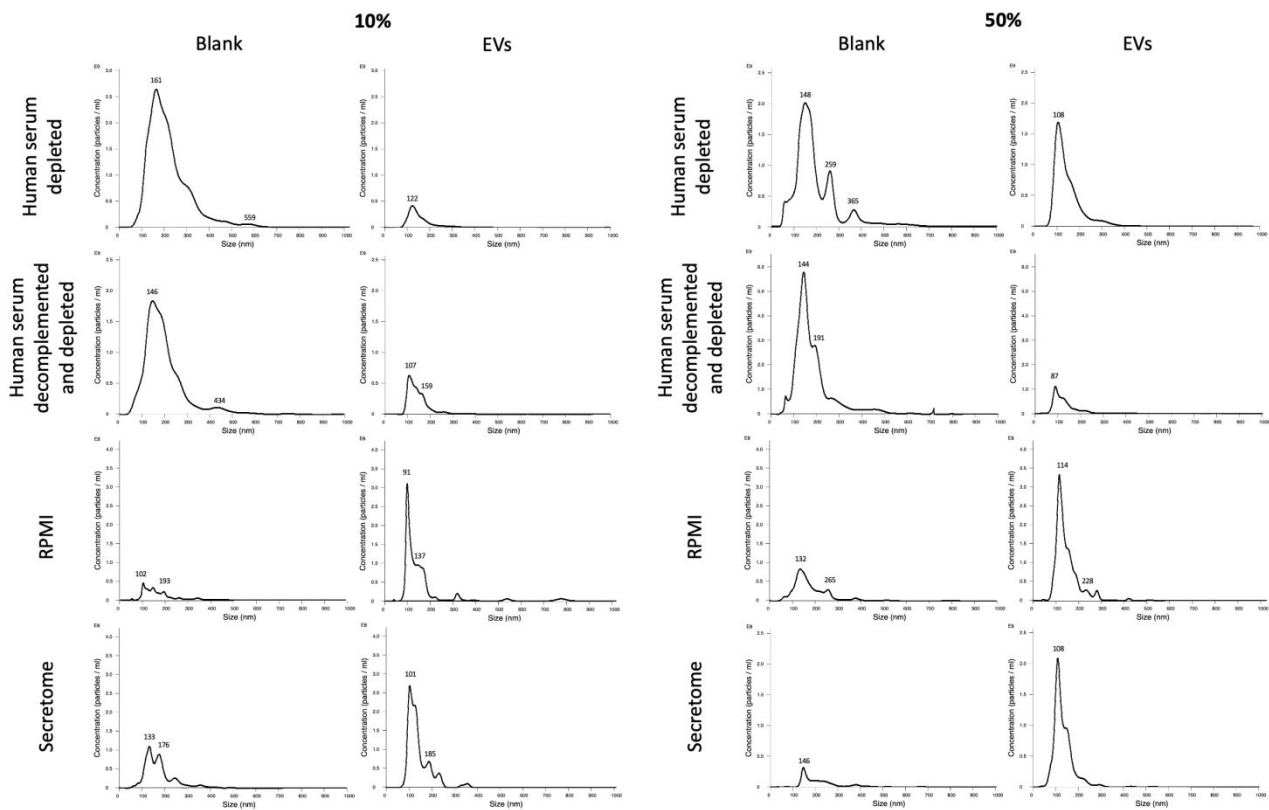

**Figure S1.** The panel represented the size distribution histograms obtained from the NTA of the samples with biological-derived excipients. In details, the first two columns (blank and sample with EVs) are the samples at the 10% (v/v) concentration, while the latter two (blank and sample with EVs) the ones at 50% (v/v). All the graphs showed the size of the particles (nm) on the x-axis and the concentration (particles/ml) on the y-axis.
